# Supplementary material
Source: MDPI journal article supplement (https://www.mdpi.com/2073-4395/11/6/1142)
Supplement: s1 [file s1]

**Table S1.** Main soil chemical-physical properties of each vineyard according to soil horizons.

| Code | MU | G  | Horizons | Depth<br>cm | Sand<br>(%) | Silt<br>(%) | Clay<br>(%) | Soil<br>reaction<br>pH | Organic<br>carbon<br>(%) | Calcium<br>carbonate (%) |
|------|----|----|----------|-------------|-------------|-------------|-------------|------------------------|--------------------------|--------------------------|
| 295  | LM | E  | Ap1      | 0-60        | 22.6        | 48.5        | 28.9        | 8.0                    | 2.7                      | 19.1                     |
|      |    |    | Ap2      | 60-90       | 18.9        | 51.0        | 30.1        | 8.2                    | 0.7                      | 20.1                     |
|      |    |    | BC       | 90-120      | 22.4        | 51.0        | 26.6        | 8.3                    | 0.9                      | 19.7                     |
| 287  | LM | E  | Ap1      | 0-25        | 27.0        | 50.4        | 22.6        | 8.1                    | 1.5                      | 21.6                     |
|      |    |    | Ap2      | 25-50       | 17.6        | 55.4        | 27.0        | 8.4                    | 0.9                      | 22.5                     |
| 283  | LM | SE | Ap1      | 0-25        | 19.0        | 55.3        | 25.7        | 8.0                    | 1.4                      | 17.1                     |
|      |    |    | Ap2      | 25-45       | 13.4        | 59.8        | 26.8        | 8.2                    | 0.9                      | 19.1                     |
|      |    |    | Bw       | 45-80       | 21.8        | 52.0        | 26.2        | 8.5                    | 0.8                      | 18.4                     |
|      |    |    | Bwk      | 80-110      | 17.4        | 57.0        | 25.6        | 8.3                    | 0.3                      | 26.4                     |
|      |    |    | BCK      | 110-150     | 18.9        | 49.8        | 31.3        | 8.4                    | 0.0                      | 22.6                     |
| 292  | LM | SE | Ap       | 0-40        | 28.8        | 44.8        | 26.4        | 8.1                    | 1.4                      | 20.5                     |
|      |    |    | Bw       | 40-80       | 22.8        | 49.2        | 28.0        | 8.5                    | 0.6                      | 22.2                     |
|      |    |    | BC       | 80-110      | 24.4        | 48.1        | 27.5        | 8.5                    | 0.5                      | 21.5                     |
| 293  | LM | SE | Ap       | 0-50        | 19.3        | 52.5        | 28.2        | 8.5                    | 0.5                      | 16.2                     |
|      |    |    | AB       | 50-75       | 16.2        | 55.6        | 28.2        | 8.5                    | 0.5                      | 16.7                     |
|      |    |    | Bw       | 75-105      | 17.6        | 51.3        | 31.1        | 8.5                    | 0.7                      | 18.1                     |
|      |    |    | Cr       | 105-125     | 9.3         | 58.6        | 32.1        | 8.5                    | 0.3                      | 19.0                     |
| 294  | LM | SE | Ap1      | 0-30        | 29.5        | 48.2        | 22.3        | 8.6                    | 0.5                      | 24.7                     |
|      |    |    | Ap2      | 30-55       | 24.8        | 52.6        | 22.6        | 8.6                    | 0.4                      | 27.3                     |
|      |    |    | C        | 55-65       | 23.8        | 53.7        | 22.5        | 8.6                    | 0.3                      | 19.9                     |
|      |    |    | 2Cr      | 65-85       | 85.2        | 9.9         | 4.9         | 8.7                    | 0.1                      | 18.6                     |
| 297  | LM | SE | Ap1      | 0-15        | 16.1        | 56.0        | 27.9        | 8.3                    | 1.2                      | 19.4                     |
|      |    |    | Ap2      | 15-45       | 10.0        | 57.0        | 33.0        | 8.4                    | 1.0                      | 19.5                     |
|      |    |    | AB       | 45-70       | 11.2        | 58.7        | 30.1        | 8.4                    | 0.7                      | 19.8                     |
|      |    |    | Bt/C     | 70-95       | 18.4        | 51.4        | 30.2        | 8.5                    | 0.4                      | 17.2                     |
| 296  | LM | SE | Ap       | 0-60        | 24.1        | 44.1        | 31.8        | 8.2                    | 1.2                      | 12.4                     |
|      |    |    | AB       | 60-80       | 28.0        | 45.7        | 26.3        | 8.3                    | 0.2                      | 23.1                     |
|      |    |    | Bt1      | 80-105      | 25.7        | 46.2        | 28.1        | 8.3                    | 0.3                      | 16.1                     |
|      |    |    | Bt2      | 105-140     | 26.1        | 46.4        | 27.5        | 8.4                    | 0.2                      | 21.9                     |
| 273  | SB | SW | Ap1      | 0-20        | 29.3        | 45.3        | 25.4        | 8.5                    | 0.6                      | 21.2                     |
|      |    |    | Ap2      | 20-75       | 30.1        | 46.5        | 23.4        | 8.5                    | 0.7                      | 21.6                     |
|      |    |    | Bw1      | 75-110      | 26.2        | 47.1        | 26.7        | 8.5                    | 0.5                      | 21.8                     |
|      |    |    | Bw2      | 110-130     | 28.8        | 45.0        | 26.2        | 8.3                    | 0.3                      | 23.7                     |
| 289  | SB | SW | Ap       | 0-25        | 18.7        | 56.5        | 24.8        | 8.5                    | 0.4                      | 26.5                     |
|      |    |    | AC       | 25-50       | 19.4        | 56.5        | 24.1        | 8.5                    | 0.6                      | 26.7                     |
|      |    |    | C1       | 50-75       | 18.4        | 56.1        | 25.5        | 8.5                    | 0.7                      | 25.8                     |
|      |    |    | C2       | 75-100      | 27.5        | 49.7        | 22.8        | 8.5                    | 0.4                      | 24.7                     |
| 291  | SB | SW | Ap       | 0-30        | 36.5        | 40.5        | 23.0        | 8.5                    | 0.8                      | 28.1                     |
|      |    |    | Bw       | 30-60       | 30.9        | 45.4        | 23.7        | 8.4                    | 0.9                      | 28.2                     |
|      |    |    | BC       | 60-80       | 34.1        | 43.6        | 22.3        | 8.4                    | 0.7                      | 26.6                     |
|      |    |    | C        | 80-120      | 34.3        | 42.9        | 22.8        | 8.4                    | 0.7                      | 27.6                     |
| 274  | SB | SW | Ap       | 0-25        | 20.9        | 54.6        | 24.5        | 8.1                    | 0.7                      | 17.4                     |
|      |    |    | AC1      | 25-55       | 28.2        | 53.7        | 18.1        | 7.8                    | 0.5                      | 14.0                     |

|     |          |   |     |         |      |      |      |     |     |      |
|-----|----------|---|-----|---------|------|------|------|-----|-----|------|
|     |          |   | AC2 | 55-75   | 18.0 | 56.9 | 25.1 | 8.0 | 0.5 | 16.8 |
|     |          |   | C   | 75-95   | 19.0 | 56.4 | 24.6 | 7.8 | 0.3 | 15.7 |
| 284 | <b>B</b> | W | Ap1 | 0-25    | 28.6 | 50.9 | 20.5 | 8.3 | 0.8 | 22.4 |
|     |          |   | Ap2 | 25-40   | 37.8 | 44.8 | 17.4 | 8.5 | 0.4 | 21.5 |
|     |          |   | Bw  | 40-75   | 38.2 | 44.6 | 17.2 | 8.5 | 0.5 | 21.4 |
|     |          |   | BC  | 75-100  | 40.0 | 43.1 | 16.9 | 8.6 | 0.4 | 21.8 |
|     |          |   | C   | 100-125 | 35.6 | 44.5 | 19.9 | 8.5 | 0   | 25.1 |
| 285 | <b>B</b> | W | Ap  | 0-25    | 25.2 | 51.5 | 23.3 | 8.2 | 1.8 | 14.6 |
|     |          |   | AC1 | 25-40   | 17.5 | 61.7 | 20.8 | 8.6 | 0.7 | 24.9 |
|     |          |   | AC2 | 40-75   | 16.8 | 59.9 | 23.3 | 8.5 | 0.8 | 25.2 |
| 286 | <b>B</b> | W | Ap1 | 0-25    | 19.9 | 54.6 | 25.5 | 8.5 | 1.1 | 22.8 |
|     |          |   | Ap2 | 25-50   | 22.2 | 52.5 | 25.3 | 8.2 | 1.2 | 23.9 |
|     |          |   | C1  | 50-100  | 27.1 | 55.2 | 17.7 | 8.6 | 0.3 | 18.4 |
|     |          |   | C2  | 100-110 | 83.2 | 14.3 | 2.5  | 8.7 | 0.2 | 16.6 |
| 288 | <b>B</b> | W | Ap1 | 0-20    | 19.5 | 51.9 | 28.6 | 8.3 | 0.7 | 24.7 |
|     |          |   | Ap2 | 20-40   | 18.3 | 58.4 | 23.3 | 8.5 | 0.2 | 43.8 |
|     |          |   | Bw  | 40-55   | 20.6 | 48.0 | 31.4 | 8.4 | 0.6 | 15.3 |
|     |          |   | BwC | 55-90   | 20.6 | 49.0 | 30.4 | 8.4 | 0.6 | 18.7 |
| 290 | <b>B</b> | W | Ap  | 0-30    | 19.8 | 51.8 | 28.4 | 8.4 | 0.5 | 27.4 |
|     |          |   | AC  | 30-50   | 17.7 | 55.0 | 27.3 | 8.5 | 0.3 | 28.4 |
|     |          |   | C   | 50-90   | 24.0 | 50.8 | 25.2 | 8.4 | 0.9 | 27.8 |
